# Supplementary material for: Immunohistochemistry-based molecular classification using TCGA and ACRG Algorithm in locally advanced and metastatic gastric cancer
Source: Research Square preprint supplement (doi:10.21203/rs.3.rs-7132901/v1), 2025-07-28
Supplement: Supplementary file 1 [file 38262c58413c9ea476067ffa.docx]

# Original Article

**Immunohistochemistry-based molecular classification using TCGA and ACRG Algorithm in locally advanced and metastatic gastric cancer**

Charles L1, Yadav Nisha1, Esha Jafa1, Babu Vishva 1, , Rajesh Nachiappa Ganesh 5, Vikram Kate 3, Sandhiya S 4, Smita Kayal 1, , Biswajit Dubashi1*, Bheemanathi Hanuman Srinivas 5, Prasanth Penumadu 2, Prasanth Ganesan 1. Kalayarasan Raja 6.

1 Department of Medical Oncology, 2 Department of Surgical Oncology, 3 Department of Surgery, 4 Department of Pharmacology, 5 Department of Pathology. 6 Department of Surgical Gastroenterology. Jawaharlal Institute of Postgraduate Medical Education and Research (JIPMER), Dhanvantari Nagar, Pondicherry - 605006, India.

*Corresponding author

Dr. BISWAJIT DUBASHI, M.D, D.N.B, D.M, D.N.B, ECMO Professor

Postal address: Department of Medical Oncology, Regional Cancer Centre, JIPMER, Dhanvantari Nagar, Puducherry-605006, India, Tel: 0413-2297308, +918056338405, Fax: NA, Email: [drbiswajitdm@gmail.com](mailto:drbiswajitdm@gmail.com)

**Supplementary table 1: EBV and PI3K status in relation to clinic pathological variable**

| **S.I No.** | **Variable** | **EBV** | | **P- Value** | **Pi3k** | | **P- Value** |
| --- | --- | --- | --- | --- | --- | --- | --- |
| **Neg** | **Pos** | **Neg** | **Pos** |
| **1** | **Gender (n=191)**  Male | 100 (64.1) | 19(54.3) | 0.30 | 83(63.4) | 36(60.0) | 0.66 |
|  | Female | 56 (35.9) | 16(45.7) |  | 48(36.6) | 24(40.0) |  |
| **2** | **Age (n=191)** |  |  |  |  |  |  |
| **≤ 40** | 16(10.3) | 10(28.6) | **0.004** | 16(12.2) | 10(16.7) | 0.41 |
| **> 40** | 140(89.7) | 25(71.4) |  | 115(87.8) | 50(83.3) |  |
| **3** | **BMI (n=163)**  Underweight | 71(53.8) | 18(58.1) | 0.95 | 61(54.5) | 28(54.9) | 0.90 |
|  | Normal weight | 52(39.4) | 11(35.5) |  | 44(39.3) | 19(37.3) |  |
|  | Overweight & obese | 9(6.8) | 2(6.5) |  | 7(6.2) | 4(7.8) |  |
| **4** | **ECOG (n=191)**  0-1 | 116(74.4) | 21(60.0) | 0.09 | 92(70.2) | 45(75.0) | 0.50 |
|  | ≥2 | 40(25.6) | 14(40.0) |  | 39(29.8) | 15(25.0) |  |
| **5** | **Co-Morbidity (n=191)** |  |  |  |  |  |  |
|  | Yes | 28(17.9) | 7(20.0) | 0.78 | 28(21.4) | 7(11.7) | 0.11 |
|  | No | 128(82.1) | 28(80.0) |  | 103(78.6) | 53(88.3) |  |
| **6** | **TNM staging (n=189)** |  |  |  |  |  |  |
|  | T1-3 | 28(18.2) | 5(14.3) | 0.52 | 24(18.5) | 9(15.3) | 0.59 |
|  | T4a | 27(17.5) | 10(28.6) |  | 27(20.8) | 10(16.9) |  |
|  | T4b | 24(15.6) | 5(14.3) |  | 17(13.1) | 12(20.3) |  |
|  | Mets | 75(48.7) | 15(42.9) |  | 62(47.7) | 28(47.5) |  |
| **7** | **Stage (n=191)** |  |  |  |  |  |  |
|  | Early | 2(1.3) | 0(0.0) | 0.72 | 2(1.5) | 0(0.0) | 0.94 |
|  | Locally advanced | 79(50.6) | 20(57.1) |  | 67(51.1) | 32(53.3) |  |
|  | Metastasis | 75(48.1) | 15(42.9) |  | 62(47.3) | 28(46.7) |  |
| **8** | **Metastasis (n=89)** |  |  |  |  |  |  |
|  | Single | 57(77.0) | 14(93.3) | 0.29 | 50(82.0) | 21(75.0) | 0.45 |
|  | Multiple | 17(23.0) | 1(6.7) |  | 11(18.0) | 7(25.0) |  |
| **9** | **Grade (n=57)** |  |  |  |  |  |  |
|  | Well differentiated | 21(42.0) | 5(71.4) | 0.42 | 14(40.0) | 12(54.5) | 0.43 |
|  | Moderately differentiated | 23(46.0) | 2(28.6) |  | 16(45.7) | 9(40.9) |  |
|  | Poorly differentiated | 6(12.0) | 0(0.0) |  | 5(14.3) | 1(4.5) |  |
| **10** | **Histopathology Subtype (n=189)** |  |  |  |  |  |  |
|  | Diffuse | 65(42.2) | 10(28.6) | 0.12 | 53(41.1) | 22(36.7) | 0.63 |
|  | Intestinal | 89(57.8) | 25(71.4) |  | 76(58.9) | 38(63.3) |  |
| **11** | **Site of tumour (n=179)** |  |  |  |  |  |  |
|  | GEJ/Cardia/  Body | 52(35.4) | 13(40.6) | 0.58 | 41(32.3) | 24(46.2) | **0**.09 |
|  | Antrum/Pylour  s | 95(64.6) | 19(59.4) |  | 86(67.7) | 28(53.8) |  |
| **12** | **Peritoneal Vs Non – Peritoneal (n=189)** |  |  |  |  |  |  |
|  | Peritoneal | 20(12.8) | 3(8.6) | 0.77 | 18(13.7) | 5(8.3) | 0.29 |
|  | Non- Peritoneal | 136(87.2) | 32(91.4) |  | 113(86.3) | 55(91.7) |  |
| **13** | **Signet vs Non- Signet (n=189)** |  |  |  |  |  |  |
|  | Signet | 21(13.6) | 4(11.4) | 1.00 | 15(11.6) | 10(16.7) | 0.34 |
|  | Non-Signet | 133(86.4) | 31(88.6) |  | 114(88.4) | 50(83.3) |  |

BMI - Body Mass Index ECOG - Eastern Cooperative Oncology Group

TNM - Tumor Node Metastasis GEJ - Esophagogastric junction

Pi3K - Phosphoinositide 3-kinases EBV - Epstein Bar Virus

**Supplementary table 2: Comparison of clinical, pathological and treatment between Diffuse and intestinal groups**

| **S.I No.** | **Variable** | **N** | **Category** | **Diffuse** | **Intestinal** | **P value** |
| --- | --- | --- | --- | --- | --- | --- |
| **1.** | **Age** | 189 | ≤ 40 | 17(22.7) | 9(7.9) | **0.004** |
| > 40 | 58(77.3) | 105(92.1) |  |
| **2.** | **Gender** | 189 | Female | 35(46.7) | 37(32.5) | **0.049** |
|  | Male | 40(53.3) | 77(67.5) |  |
| **3.** | **BMI** | 162 | Underweight | 38(59.4) | 50(51.0) | 0.578 |
|  | Normal weight | 22(34.4) | 41(41.8) |  |
|  |  |  | Overweight & obese | 4(6.2) | 7(7.1) |  |
| **4.** | **ECOG** | 189 | 0-1 | 51(68.0) | 85(74.6) | 0.326 |
| ≥ 2 | 24(32.0) | 29(25.4) |  |
| **5.** | **Co-Morbidity** | 189 | Yes | 12(16.0) | 23(20.2) | 0.470 |
| No | 63(84.0) | 91(79.8) |  |
| **6.** | **GOO** | 105 | Positive | 18(47.4) | 26(38.8) | 0.393 |
| Negative | 20(52.6) | 41(61.2) |  |
| **7.** | **Stage** | 189 | Early | 0(0.0) | 2(1.8) | 0.739 |
| Locally advanced | 39(52.0) | 58(50.9) |  |
| Mets | 36(48.0) | 54(47.4) |  |
| **8.** | **TNM Staging** |  |  |  |  |  |
|  | **Initial Staging** | 98 | T ≤ 3 | 13(33.3) | 20(33.9) | 0.954 |
| T > 3 | 26(66.7) | 39(66.1) |  |
| 9. | **Node** | 96 | N < 2 | 20(52.6) | 26(44.8) | 0.454 |
| N ≥ 2 | 18(47.4) | 32(55.2) |  |
| **10.** | **Site of tumour** | 178 | GEJ/Cardia/  Body | 30(42.9) | 35(32.4) | 0.157 |
| Antrum/Pylour  s | 40(57.1) | 73(67.6) |  |
| **11.** | **IHC** |  |  |  |  |  |
|  | **EBV** | 189 | Negative | 65(86.7) | 89(78.1) | 0.137 |
| Positive | 10(13.3) | 25(21.9) |  |
| **PI3K** | 189 | Negative | 53(70.7) | 76(66.7) | 0.563 |
| Positive | 22(29.3) | 38(33.3) |  |
| **MSI** | 189 | dmr | 7(9.3) | 26(22.8) | **0.017** |
| pmr | 68(90.7) | 88(77.2) |  |
| **P53** | 189 | Negative | 69(92.0) | 96(84.2) | 0.116 |
| Positive | 6(8.0) | 18(15.8) |  |
| **E-cad** | 189 | Negative | 39(52.0) | 16(14.0) | **<0.0001** |
| Positive | 36(48.0) | 98(86.0) |  |
| **12** | **Peritoneal Vs Non – Peritoneal** | 189 | Peritoneal | 11(14.7) | 12(10.5) | 0.394 |
| Non- Peritoneal | 64(85.3) | 102(89.5) |  |
| **13** | **Signet vs non-Signet** | 189 | Signet | 25(33.3) | 0(0.0) | **<0.0001** |
| Non-Signet | 50(66.7) | 114(100.0) |  |
|  |  |  |  |  |  |  |

**Supplementary table 3: Overall survival of the TCGA subtype**

| **Groups** | **N = 191** | **Event = 156** | **Median OS** | **P-value** |
| --- | --- | --- | --- | --- |
| TCGA |  |  |  |  |
| EBV+ | 35 | 27 | 15 (9.9-20.1) | **<0.0001** |
| MSI (dmr) | 28 | 13 | 32 (18.9-45.1) |  |
| CIN (E-cad+) | 80 | 73 | 8 (5.7-10.3) |  |
| GS ((E-cad−) | 48 | 43 | 9 (5.7-12.3) |  |

**Supplementary table 4: Overall survival of locally advanced patients by TCGA subtype**

| **TCGA Group** | **Total N=99** | **N of Events**  **N=78** | **OS (months)** | **P value** |
| --- | --- | --- | --- | --- |
| EBV+ | 20 | 14 | 22 (15.83-28.17) | **0.002** |
| MSI(dmr) | 15 | 7 | 32(14.36-49.64) |  |
| CIN_(E-cad:+) | 38 | 35 | 9(0.51-17.49) |  |
| GS(E-cad:-) | 26 | 22 | 9(5.25-12.75) |  |

**Supplementary table 5: Overall survival of metastatic patients by TCGA subtype**

| TCGA Group | Total N=90 | N of Events  N=77 | OS (months) | P value |
| --- | --- | --- | --- | --- |
| EBV+ | 15 | 13 | 9(3.36-14.65) | 0.056 |
| MSI(dmr) | 12 | 6 | 35(13.56-56.45) |  |
| CIN_(E-cad:+) | 41 | 37 | 7(3.91-10.09) |  |
| GS(E-cad:-) | 22 | 21 | 8(4.47-11.52) |  |

**Supplementary table 6: Overall survival of the ACRG subtype**

| **Groups** | **N = 191** | **Event = 156** | **Median OS** | **P-value** |
| --- | --- | --- | --- | --- |
| ACGRG |  |  |  |  |
| MSI | 33 | 14 | 32 (17.4-46.6) | **<0.0001** |
| MSS/EMT | 51 | 46 | 9 (6.4-11.6) |  |
| MSS/p53+ | 16 | 15 | 9 (1.2-16.8) |  |
| MSS/p53− | 91 | 81 | 9 (5.8-12.2) |  |

**Supplementary table 7: Overall survival of locally advanced patients by ACRG subtype**

| ACRG | Total N=99 | N of Events  N=78 | OS (months) | P value |
| --- | --- | --- | --- | --- |
| MSI(dmr) | 18 | 8 | 32(18.60-45.40) | **0.008** |
| MSS(pmr)/EMT(E-cad:-) | 27 | 23 | 11(7.20-14.80) |  |
| MSS(pmr), E-Cad +/P53+ | 9 | 8 | 17(8.24-25.77) |  |
| MSS(pmr)/P53- | 45 | 39 | 13(9.40-16.62) |  |

**Supplementary table 8: Overall survival of metastatic patients by ACRG subtype**

| ACRG | Total N=90 | N of Events  N=77 | OS (months) | P value |
| --- | --- | --- | --- | --- |
| MSI(dmr) | 14 | 6 | 35(13.67-56.37) | **0.023** |
| MSS(pmr)/EMT(E-cad:-) | 24 | 23 | 8(1.79-14.21) |  |
| MSS(pmr), E-Cad +/P53+ | 7 | 7 | 7(0.00-17.27) |  |
| MSS(pmr)/P53- | 45 | 41 | 6(3.51-8.49) |  |

**Supplementary table 9: Comparative table of IHC classification with TCGA and ACRG classification**

| **Sl. no.** | **Variables** | **Class by TCGA in our study** | **TCGA original**(19) | **Ramos et al. TCGA based study** (45) | **Class. by ACRG in our study** | **ACRG original** (20) | **Ramos et al. ACRG-based study** (45) |
| --- | --- | --- | --- | --- | --- | --- | --- |
|  | **Sample size (n)** | 191 | 295 | 287 | 191 | 300 | 287 |
| **1** | **Methodology** | IHC | NGS | IHC/FISH | IHC | NGS | IHC |
| **2** | **Population** | India | USA | Brazil | India | Seoul, Korea | Brazil |
| **3** | **Subtype** | EBV:18% MSI: 15%  GS: 25%  CIN: 42% | EBV: 9%  MSI: 22%  GS: 20%  CIN :50% | EBV:10.5%  MSI :20.2%  GS: 7.0%  CIN :62.2% | MSI: 17%  MSS/EMT:26.7% MSS/p53+:47.6% MSS/p53−: 8.4% | MSI:22.7% MSS/EMT:15.3% MSS/p53+:26.3% MSI/p53−: 35.7% | MSI: 21%  MSS/EMT:23% MSS/p53+:38.3% MSS/p53−: 32.8% |
| **4** | **Significant clinicopathological pattern** | Age, histology, PIK3CA | Age, site of tumor, gender, histology | Age, tumor site, size, PNI, histology, pTNM stage | Histology, PIK3CA | Age, histology, tumor site, pTNM stage, PNI | Age, histology, tumor site, pTNM stage, |
| **5** | **Survival (OS)** | MSI:Good EBV:Inter CIN: Poor  GS: Poor | EBV:Good MSI: Inter  CIN: Inter  GS: Poor | MSI: Good  EBV: Inter  CIN: Inter  GS: Poor | MSI : Good MSS/EMT : Poor MSS/p53− : Poor MSS/p53+ : Poor | MSI : Good MSS/p53−: Inter MSS/p53+: Inter MSS/EMT: Poor | MSI : Good  MSS/p53− :Inter MSS/p53+ : Inter MSS/EMT : Poor |

**Supplementary figure: 1**


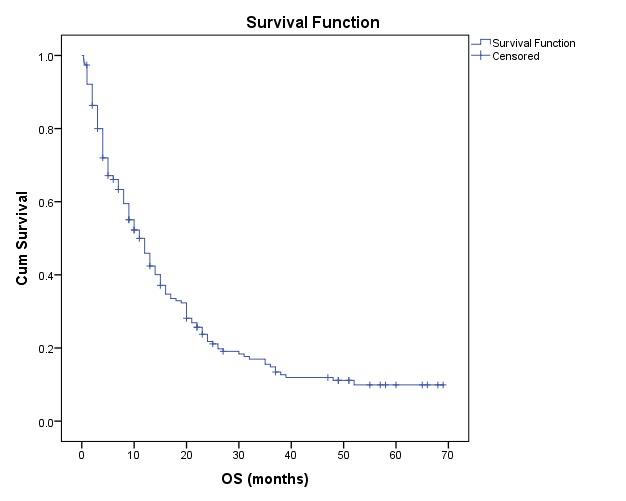


The median duration of follow-up = 51 (47.8-54.2) months. The overall survival of the entire cohort 11 (8.7-13.3) months.
